# Supplementary material for: Effect of Overexpression of γ-Tocopherol Methyltransferase on α-Tocopherol and Fatty Acid Accumulation and Tolerance to Salt Stress during Seed Germination in Brassica napus L
Source: MDPI journal article supplement (doi:10.3390/ijms232415933), 2022-12-14
Supplement: s1 [file s1]

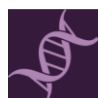

## Supplementary Materials:

**Table S1.** The primers used in this study.

| Primer Name         | Orientation | Sequence (5'-3')             | Annotations          |
|---------------------|-------------|------------------------------|----------------------|
| BnaC02.TMT.a_Fc     | Forward     | AATCCCATACACAGCCACA          | specific primers for |
| BnaC02.TMT.a_Rc     | Reverse     | CTAAAATAGACAACGTAGCC         |                      |
| BnaC02.TMT.a-XhoI-F | Forward     | CCGCTCGAGATGAAAGCGACTCTCGCAC | nested primers for   |
| BnaC02.TMT.a-ClaI-R | Reverse     | CCATCGATGAGAGGCTTCTGGCAAGTG  |                      |
| 35S_P               | Forward     | GACCCTTCCTCTATATAAGGAAGTTC   | DNA genotyping       |
| BnTMT_R             | Reverse     | GAGAGGCTTCTGGCAAGTG          |                      |
| BnGAPDH_F-qPCR      | Forward     | CCGCTTCCTTCAACATCATT         | RT-qPCR              |
| BnGAPDH_R-qPCR      | Reverse     | GTCGCAGCTTTCTCGAGTCT         |                      |
| BnTMT_F-qPCR        | Forward     | GCCTCCCAAGGCACAAAGT          |                      |
| BnTMT_R-qPCR        | Reverse     | TCCGCTATTCCTTCTCGCAG         |                      |
| BnFAD2_F-qPCR       | Forward     | GTTTCCTCGTGTGATCACTTAC       |                      |
| BnFAD2_R-qPCR       | Reverse     | TGATAATGCGGCATCGTGGA         |                      |
| BnFAD3_F-qPCR       | Forward     | TATAAGGGCGGCCATTCTTAAGCA     |                      |
| BnFAD3_R-qPCR       | Reverse     | AGATAGCCCAGAACAGGGTTCCTT     |                      |

**Table S2.** The standard curve of  $\alpha$ -,  $\beta$ -,  $\gamma$ -, and  $\delta$ -tocopherol.

| Tocopherol Forms     | Standard Curve                          | Linearity Range<br>( $\mu\text{g/mL}$ ) | Retention Time<br>(min) |
|----------------------|-----------------------------------------|-----------------------------------------|-------------------------|
| $\alpha$ -tocopherol | $y = 4.3411x - 3.7525$ ; $R^2 = 0.9996$ | 0.4–200                                 | 12.445                  |
| $\beta$ -tocopherol  | $y = 6.2545x - 0.6437$ ; $R^2 = 0.9999$ | 0.4–200                                 | 11.209                  |
| $\gamma$ -tocopherol | $y = 6.7402x - 3.6822$ ; $R^2 = 0.9996$ | 0.4–200                                 | 10.771                  |
| $\delta$ -tocopherol | $y = 4.9310x - 1.0052$ ; $R^2 = 0.9998$ | 0.4–200                                 | 9.443                   |

| Percent Identity |   |      |      |      |      |   |
|------------------|---|------|------|------|------|---|
|                  | 1 | 2    | 3    | 4    | 5    |   |
| Divergence       | 1 | 89.3 | 89.2 | 88.4 | 89.5 | 1 |
|                  | 2 | 11.6 | 98.3 | 98.6 | 98.0 | 2 |
|                  | 3 | 11.6 | 1.8  | 97.4 | 98.8 | 3 |
|                  | 4 | 12.6 | 1.5  | 2.6  | 96.5 | 4 |
|                  | 5 | 11.3 | 2.1  | 1.2  | 3.6  | 5 |
|                  | 1 | 2    | 3    | 4    | 5    |   |

At $\gamma$ -TMT (NP\_176677.1)  
 BnaC02.TMT.a (BnaC02T0331100ZS)  
 BnaC02.TMT.b (BnaC02T0197500ZS)  
 BnaA02.TMT.a (BnaA02T0247300ZS)  
 BnaA02.TMT.b (BnaA02T0154300ZS)

**Figure S1.** Percent identity (up) and divergence (down) of the amino acid sequences of the  $\gamma$ -TMT protein from *A. thaliana* and *B. napus*. 1: At $\gamma$ -TMT (NP\_176677.1); 2: BnaC02.TMT.a (BnaC02T0331100ZS); 3: BnaC02.TMT.b (BnaC02T0197500ZS); 4: BnaA02.TMT.a (BnaA02T0247300ZS); 5: BnaA02.TMT.b (BnaA02T0154300ZS). Divergence and percent identity were calculated by comparing sequence pairs to the phylogeny reconstructed by MegAlign.

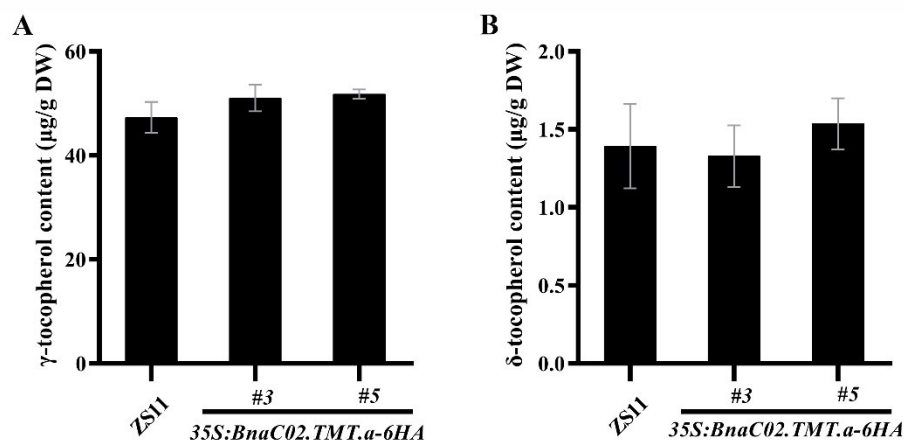

**Figure S2.** γ-tocopherol (A) and δ-tocopherol (B) content of wild-type ZS11 and 35S:*BnaC02.TMT.a-6HA* plants in mature seed of rapeseed. Error bars denote standard deviation.

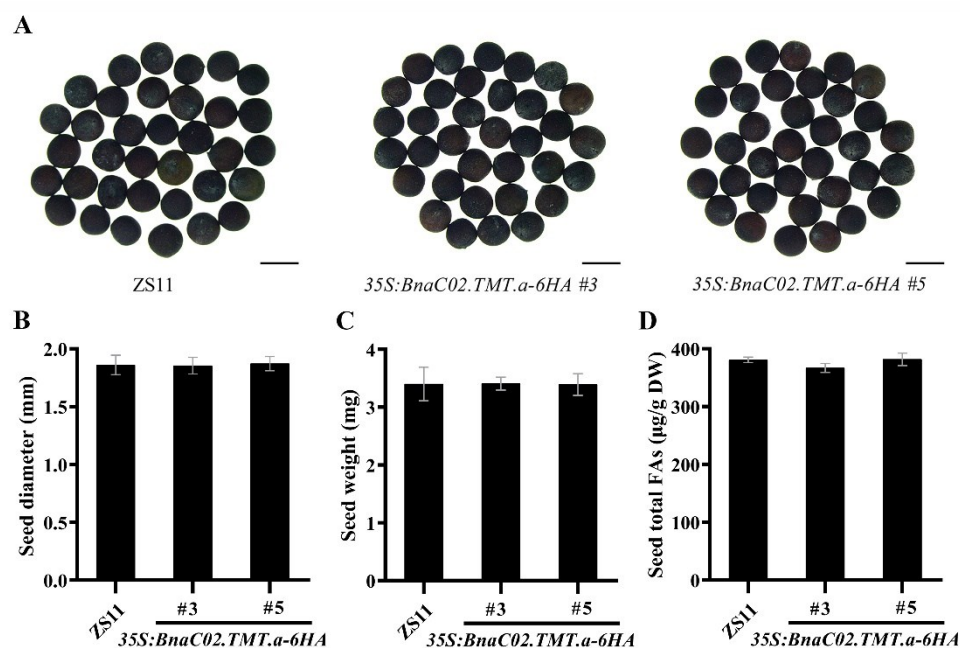

**Figure S3.** Analysis of seed coat color, seed size, seed weight and seed total FAs among wild-type ZS11 and 35S:*BnaC02.TMT.a-6HA* plants. (A) Microscopic observations of randomly selected mature seeds. Bars = 2000 μm. (B) Quantitative comparisons of seed size (length and width) between ZS11 and 35S:*BnaC02.TMT.a-6HA* plants. (C) Quantitative comparisons of seed weight between ZS11 and 35S:*BnaC02.TMT.a-6HA* plants. In (B) and (C), Values represent means ± SD (n = 5), and each of the three assays for each biological replicate contained 200 seeds from 8 individual plants grown in different pots arranged randomly within one of three blocks. (D) Seed total FA content in seeds among ZS11 and 35S:*BnaC02.TMT.a-6HA* plants.

|                                   |                                                              |       |
|-----------------------------------|--------------------------------------------------------------|-------|
| BnaC02. TMT. a (BnaC02T0331100ZS) | MKATLAPPSSLISLPRHKVSSLRSPSLLLQSQRPSSALM-TTASRGSAVATAATSSAE   | (59)  |
| BnaA. VTE4. a1 (EU637012. 1)      | MKATLA-PSSLISLPRHKVSSLRSPSLLLQSQRPSSALMTTTASRGSAVATAATSSFE   | (59)  |
|                                   | * * *                                                        |       |
| BnaC02. TMT. a (BnaC02T0331100ZS) | ALREGIAEFYNETSGLWEEIWGDHMHGFDYDPSSVQLSDSGHREAQIRMIEESLRFAGV  | (119) |
| BnaA. VTE4. a1 (EU637012. 1)      | ALREGIAEFYNETSGLWEEIWGDHMHGFDYDPSSVQLSDSGHREAQIRMIEESLRFAGV  | (119) |
| BnaC02. TMT. a (BnaC02T0331100ZS) | TEEEKKIKRVVDVCGIGGSSRYIASKFGAECIGITLSPVQAKRANDLAAAQSLSHKVSF  | (179) |
| BnaA. VTE4. a1 (EU637012. 1)      | TEEEKKIKRVVDVCGIGGSSRYIASKFGAECIGITLSPVQAKRANDLAAAQSLSHKVSF  | (179) |
| BnaC02. TMT. a (BnaC02T0331100ZS) | QVADALDQPFEDGIFDLVWSMESGEHMPDKAKFVKELVRVTAPGGRIIIVTWCHRNLSQG | (239) |
| BnaA. VTE4. a1 (EU637012. 1)      | QVADALEQPFEDGIFDLVWSMESGEHMPDKAKFVKELVRVAAPGGRIIIVTWCHRNLSPG | (239) |
|                                   | * * *                                                        |       |
| BnaC02. TMT. a (BnaC02T0331100ZS) | EESLQPWEQNLLDRICKTFYLPWCSTSDYVELLQSLSLQDIKADWSENVAPFWPAVIR   | (299) |
| BnaA. VTE4. a1 (EU637012. 1)      | EEALQPWEQNLLDRICKTFYLPWCSTSDYVDLLQSLSLQDIKADWSENVAPFWPAVIR   | (299) |
|                                   | * *                                                          |       |
| BnaC02. TMT. a (BnaC02T0331100ZS) | TALTWKGLVSLLRSGMKSIGALTMPLMIEGYKKGVIKFGIITCQKPL              | (347) |
| BnaA. VTE4. a1 (EU637012. 1)      | TALTWKGLVSLLRSGMKSIGALTMPLMIEGYKKGVIKFGIITCQKPL              | (347) |

**Figure S4.** Alignment of protein sequences of BnaC02.TMT.a from *B. napus* 'ZS11' and BnaA.VTE4.a1 from *B. napus* 'Express'. The alignment was conducted using the MUSCLE program (<http://www.ebi.ac.uk/Tools/msa/muscle/>) and the different amino acids are indicated by asterisks. S-adenosylmethionine binding sites are underlined.
